# Supplementary material for: Intact endothelial autophagy is required to maintain vascular lipid homeostasis
Source: PubMed Central journal article supplement (PMC4717267; doi:10.1111/acel.12423), 2015-11-24
Supplement: ACEL-15-187-s001.pdf [file ACEL-15-187-s001.pdf]

# Supplementary Figure 1

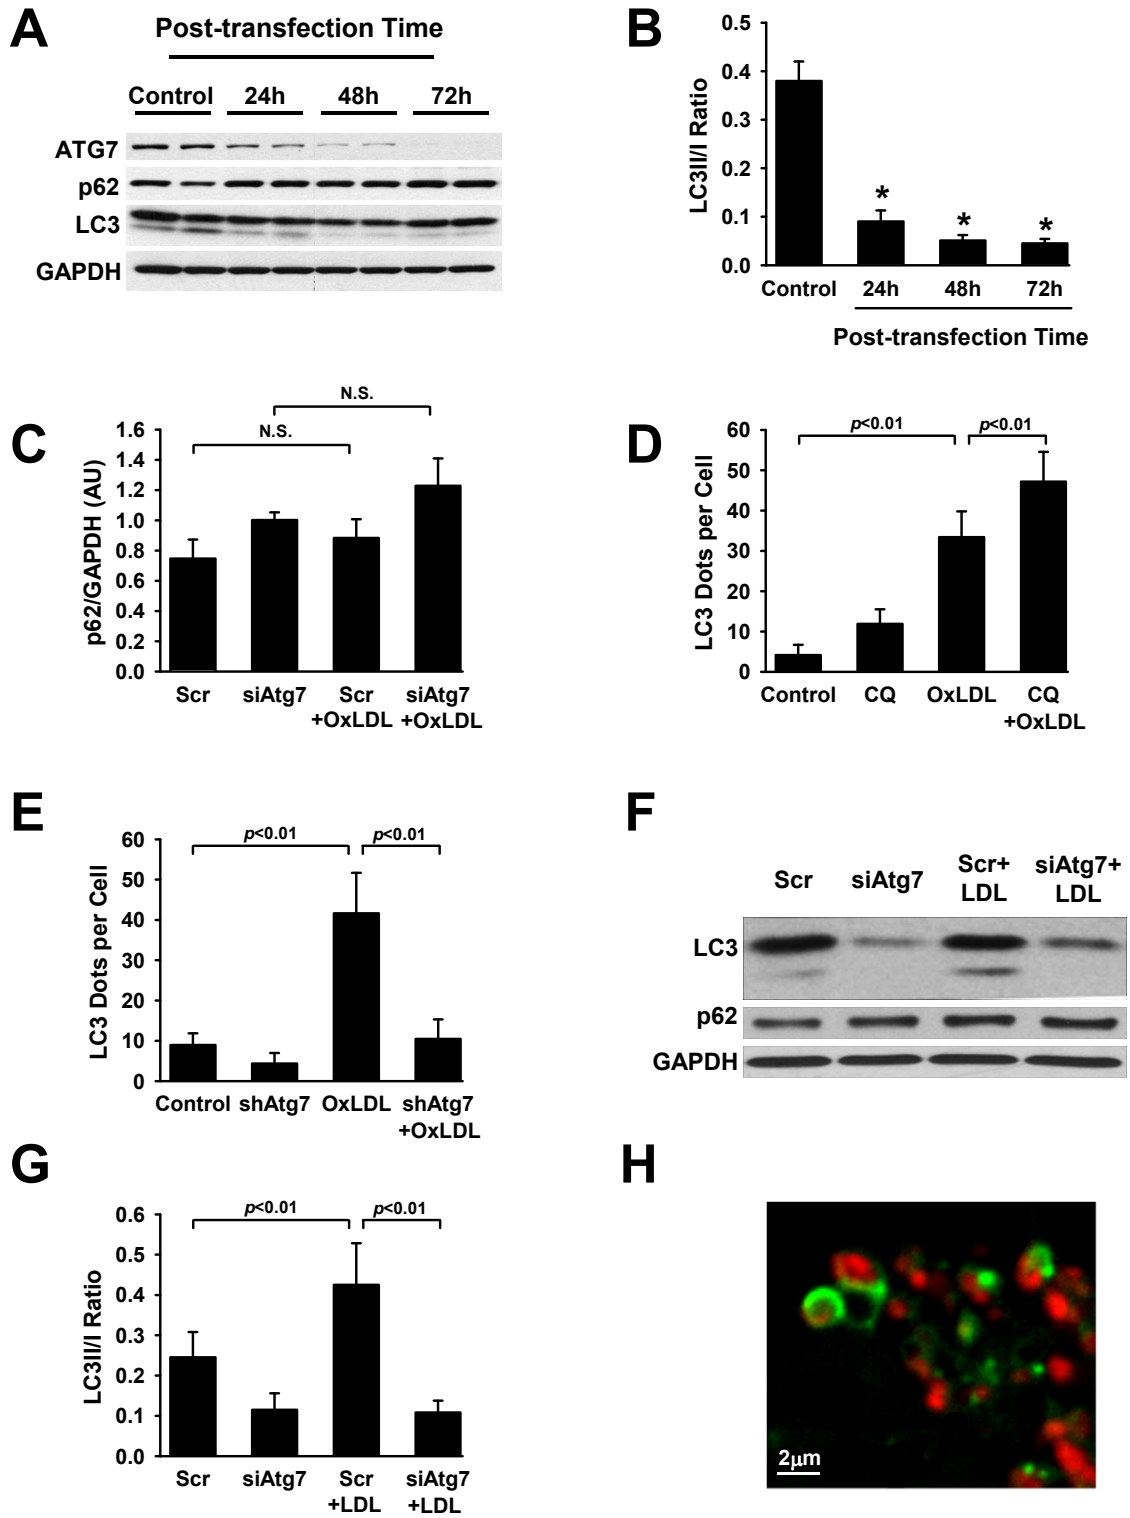

# Supplementary Figure 1, continued

I

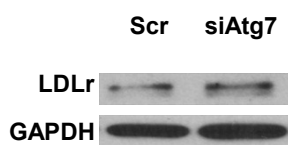

J

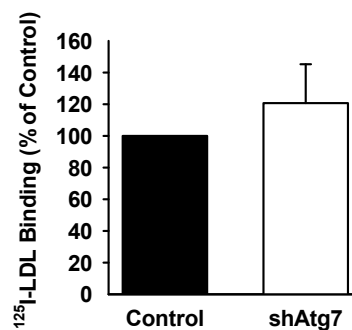

K

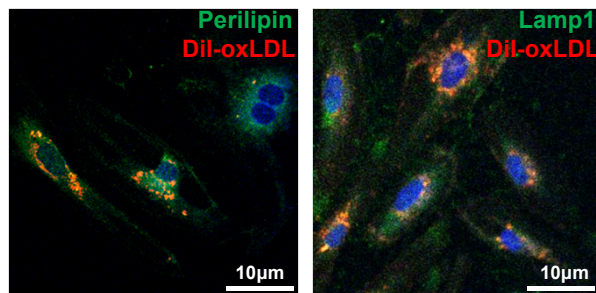

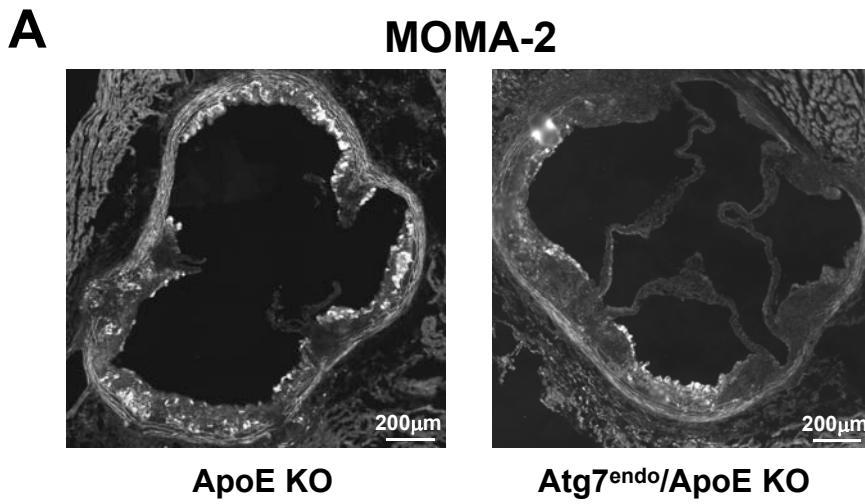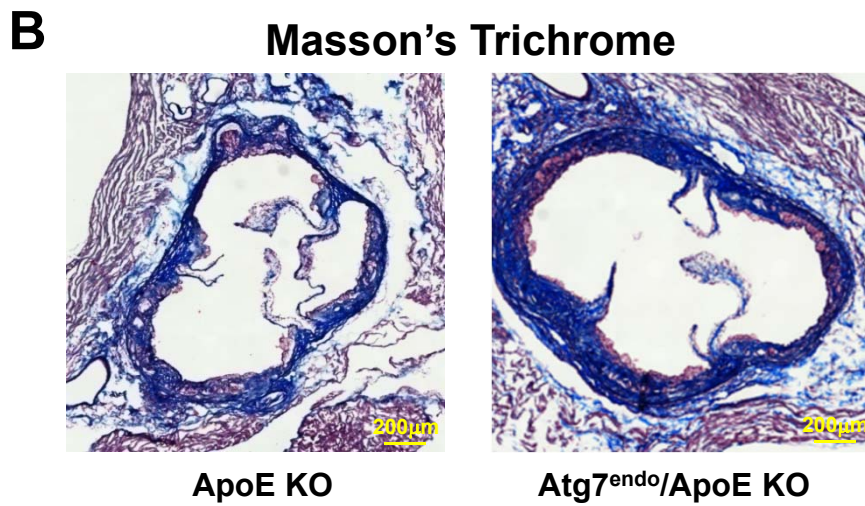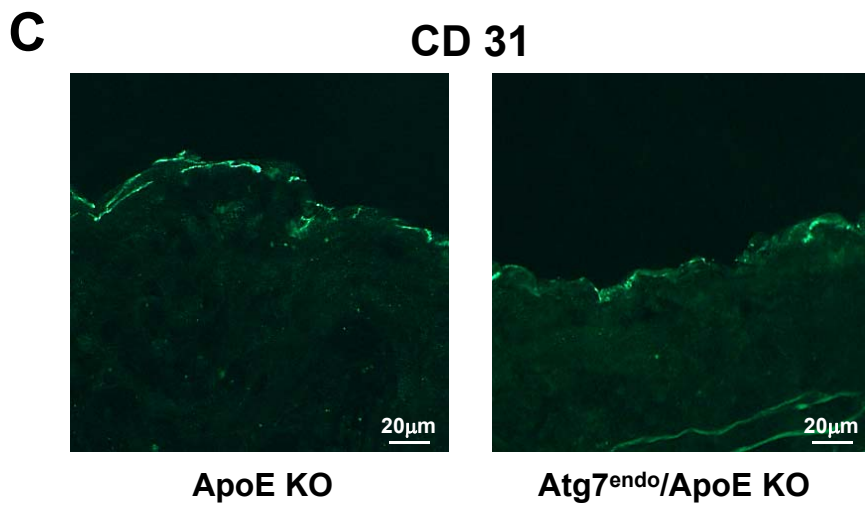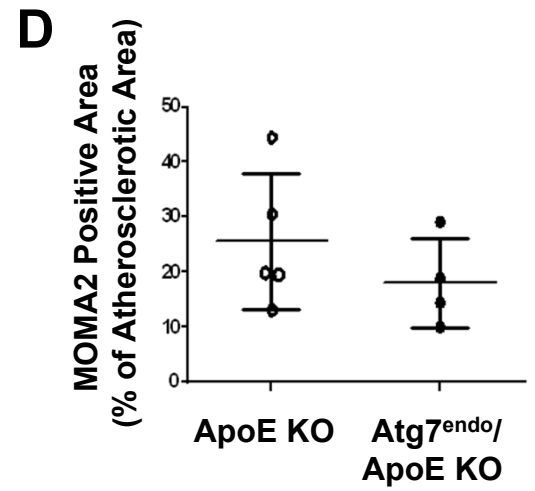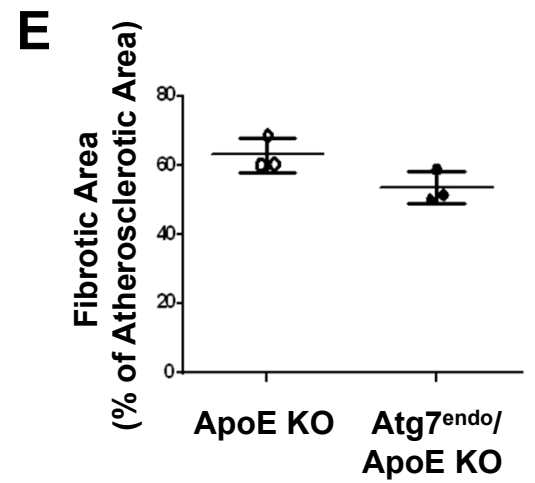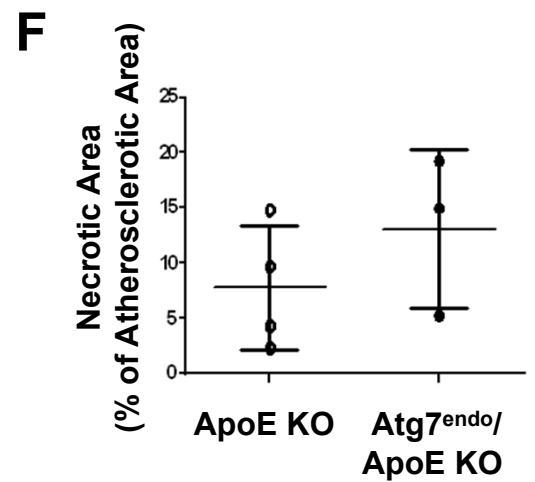

**Supplementary Table:** Serum chemistry and body weight

|                           | ApoE KO      |      | Atg7 <sup>endo</sup> /ApoE KO |      | <i>p</i> |
|---------------------------|--------------|------|-------------------------------|------|----------|
| Total Cholesterol (mg/dl) | 563.8 ± 99.4 | n=6  | 525.9 ± 72.2                  | n=4  | 0.56     |
| LDL (mg/dl)               | 194.3 ± 29.9 | n=6  | 194.2 ± 54.2                  | n=4  | 0.99     |
| HDL (mg/dl)               | 11.4 ± 7.2   | n=6  | 9.8 ± 2.9                     | n=4  | 0.66     |
| Triacylglycerol (mg/dl)   | 147.2 ± 51.4 | n=6  | 119.4 ± 27.6                  | n=4  | 0.34     |
| Free Fatty Acids (mEq/l)  | 1.12 ± 0.1   | n=11 | 1.26 ± 0.1                    | n=11 | 0.43     |
| Fasting Glucose (mg/dl)   | 111.7 ± 8.3  | n=9  | 130.5 ± 9.2                   | n=9  | 0.15     |
| Body Weight (g)           | 29.2 ± 1.0   | n=9  | 28.4 ± 2.0                    | n=9  | 0.75     |
| Fat Composition (%)       | 24.8 ± 4.3   | n=9  | 24.1 ± 3.9                    | n=9  | 0.91     |
